# Supplementary material
Source: HighWire-hosted journal article supplement (https://www.annals.org/content/suppl/2006/04/12/144.8.596)
Supplement: Lawrence_AT1_144-8-596-DC1-1.pdf [file Lawrence_AT1_144-8-596-DC1-1.pdf]

Appendix Table 1. Abstracted Data for Eligible Randomized Trials\*

| Author, Year (Reference) | Intervention                                                                     | Intervention Description                                                                                                                                                                                                                                                         | Control Description                                                                                          | Type of Surgery                                                           | Inclusion Criteria                                                                                                                                         | Exclusion Criteria                                                                                                                                                                                                                                                                                                                                                                                         | Patients Blinded | Outcome Assessment Blinded                            | Multicenter                                                 | Randomization Allocation Concealment | ITT Analysis |
|--------------------------|----------------------------------------------------------------------------------|----------------------------------------------------------------------------------------------------------------------------------------------------------------------------------------------------------------------------------------------------------------------------------|--------------------------------------------------------------------------------------------------------------|---------------------------------------------------------------------------|------------------------------------------------------------------------------------------------------------------------------------------------------------|------------------------------------------------------------------------------------------------------------------------------------------------------------------------------------------------------------------------------------------------------------------------------------------------------------------------------------------------------------------------------------------------------------|------------------|-------------------------------------------------------|-------------------------------------------------------------|--------------------------------------|--------------|
| Møller et al., 2002 (12) | Preoperative smoking cessation                                                   | Weekly meeting with project nurse; estimate of nicotine dependence; free, tailored nicotine replacement; smoking status measured by carbon monoxide in expired air; advice about cessation or reduction, benefits, side effects, or management of withdrawal symptoms and weight | Standard care: "little or no information about risk of smoking or cessation counselling"                     | Elective knee or hip replacement                                          | Daily smokers                                                                                                                                              | Weekly alcohol intake > 35 units                                                                                                                                                                                                                                                                                                                                                                           | No               | Yes                                                   | Yes: 3 university-affiliated hospitals, Copenhagen, Denmark | Adequate                             | Yes          |
| Berg et al., 1997 (13)   | Long-acting vs. intermediate-acting neuromuscular blockade                       | Pancuronium                                                                                                                                                                                                                                                                      | Atracurium or vecuronium                                                                                     | Elective major lower extremity, gynecologic, breast, or abdominal surgery | "Adults," general anesthesia, ASA class I–III                                                                                                              | Expected duration of anesthesia < 60 min, >30% ideal body weight, neuromuscular disease, preoperative drugs affecting neuromuscular transmission, renal or liver "insufficiency," increased preoperative creatinine level                                                                                                                                                                                  | No data          | Yes                                                   | Yes: 2 university-affiliated hospitals, Copenhagen, Denmark | Adequate                             | Yes          |
| Norris et al., 2001 (14) | General anesthesia vs. general + regional anesthesia and IV PCA vs. epidural PCA | 1) General + regional with IV PCA; 2) general + regional with epidural PCA                                                                                                                                                                                                       | 3) General with IV PCA; 4) general with epidural PCA                                                         | Elective abdominal aortic surgery                                         | Elective abdominal aortic surgery                                                                                                                          | Cross-clamping of thoracic aorta, contraindication to epidural, major operation in the previous 14 d, opioid dependence                                                                                                                                                                                                                                                                                    | Yes              | Yes                                                   | No                                                          | Yes                                  | Yes          |
| Rigg et al., 2002 (15)   | Intraoperative + postoperative epidural analgesia                                | Intraoperative general anesthesia and epidural local anesthetic, then postoperative epidural local anesthetic for 72 h with as-needed opioid (fentanyl or pethidine)                                                                                                             | Intraoperative general anesthesia, then postoperative IV opioid and as-needed NSAID, opioid, and paracetamol | Elective major nonlaparoscopic abdominal operations or esophagectomy      | Age > 18 y                                                                                                                                                 | Surgery < 12 h after admission, contraindication to epidural block                                                                                                                                                                                                                                                                                                                                         | No               | No                                                    | Yes: Hospitals in Australia, East Asia, and Middle East     | Yes                                  | Yes          |
| Park et al., 2001 (16)   | Intraoperative epidural anesthesia + postoperative epidural analgesia            | Intraoperative "light" general anesthesia + epidural bupivacaine, then postoperative epidural morphine and as-needed IV opioid                                                                                                                                                   | Intraoperative general anesthesia, then postoperative IV or IM opioid                                        | Elective aortic, gastric, biliary, or colon operations                    | Veterans, age ≥ 21 y                                                                                                                                       | Age < 21 y; women; confusion; ASA class I, II, or V; surgery ≤ 12 h after admission; myocardial infarction ≤ 6 mo; previous abdominal surgery ≤ 3 mo; previous aortic procedure; tracheostomy or endotracheal tube; chemo- or immunosuppression therapy other than corticosteroids; study drug hypersensitivity; contraindication to epidural; physician refusal; enrolled in other Veterans Affairs study | No               | Yes                                                   | Yes: 15 Veterans Affairs hospitals                          | Yes                                  | Yes          |
| Feron et al., 2003 (17)  | Intraoperative epidural opioid                                                   | Intraoperative general anesthesia and epidural sufentanil and morphine                                                                                                                                                                                                           | Intraoperative general anesthesia and IV sufentanil                                                          | Elective abdominal aortic surgery                                         | Consecutive patients for elective abdominal aortic surgery                                                                                                 | Contraindication to epidural                                                                                                                                                                                                                                                                                                                                                                               | No               | No                                                    | No                                                          | Yes                                  | No           |
| Mann et al., 2000 (18)   | General anesthesia + epidural anesthesia then PCEA                               | Intraoperative general anesthesia and epidural local anesthetic or opioid, then postoperative PCEA + opioid                                                                                                                                                                      | Intraoperative general anesthesia, then postoperative patient-controlled IV opioid                           | Elective major abdominal surgery for malignant condition                  | Age > 70 y, ASA class I or II, normal preoperative mental status, no severe malnutrition or cerebrovascular insufficiency, no contraindication to epidural | No additional data                                                                                                                                                                                                                                                                                                                                                                                         | No               | Yes for chest radiography, unclear for other outcomes | No                                                          | Yes                                  | No           |

Continued on following page

Appendix Table 1—Continued

| Author, Year (Reference)        | Intervention                                                                                    | Intervention Description                                                                                                                                                                                                                                                                                                                                                                    | Control Description                                                                                                                                                                                                                                    | Type of Surgery                           | Inclusion Criteria                                                                                   | Exclusion Criteria                                                                                                                                                                                               | Patients Blinded | Outcome Assessment Blinded | Multicenter | Randomization Allocation Concealment                                                           | ITT Analysis |
|---------------------------------|-------------------------------------------------------------------------------------------------|---------------------------------------------------------------------------------------------------------------------------------------------------------------------------------------------------------------------------------------------------------------------------------------------------------------------------------------------------------------------------------------------|--------------------------------------------------------------------------------------------------------------------------------------------------------------------------------------------------------------------------------------------------------|-------------------------------------------|------------------------------------------------------------------------------------------------------|------------------------------------------------------------------------------------------------------------------------------------------------------------------------------------------------------------------|------------------|----------------------------|-------------|------------------------------------------------------------------------------------------------|--------------|
| Cuschieri et al., 1985 (19)     | General anesthesia + intraoperative and postoperative local anesthetic                          | Intraoperative general anesthesia and local anesthetic, then postoperative epidural local anesthetic for 12 h, then as-needed IM morphine                                                                                                                                                                                                                                                   | Intraoperative general anesthesia, then as-needed IV continuous morphine or intermittent IM morphine                                                                                                                                                   | Elective cholecystectomy                  | Age < 75 y                                                                                           | No additional information                                                                                                                                                                                        | No               | Unclear                    | No          | Unclear                                                                                        | Yes          |
| Karayiannakis et al., 1996 (20) | LC                                                                                              | LC with 4-trocar technique                                                                                                                                                                                                                                                                                                                                                                  | OC with transverse right subcostal incision                                                                                                                                                                                                            | Elective cholecystectomy                  | All patients with symptomatic cholelithiasis                                                         | Acute cholecystitis, choledocholithiasis, age > 65 y, body mass index > 29 kg/m <sup>2</sup> , history of pulmonary disease, >10 cigarettes/d                                                                    | No               | Yes for chest radiography  | No          | Yes                                                                                            | No           |
| Signalì et al., 2004 (21)       | LCR                                                                                             | LCR                                                                                                                                                                                                                                                                                                                                                                                         | OCR                                                                                                                                                                                                                                                    | Elective colorectal resection             | Age > 18 y and candidate for laparoscopic resection                                                  | Cancer infiltrating adjacent organs by imaging, NYHA class > 3, arterial Po <sub>2</sub> < 70 mm Hg, liver dysfunction (Child-Pugh class C), "ongoing infection," neutrophil count < 2 × 10 <sup>9</sup> cells/L | No               | Yes                        | No          | Yes                                                                                            | Yes          |
| Chumillas et al., 1998 (22)     | "Respiratory rehabilitation" with breathing exercises                                           | Instruction about forced expiration technique and cough, chest expansion exercises and diaphragm mobilization, maximum inspiration for 3–5 s, and early ambulation after surgery; exercises were done for 10–15 min QID before surgery and for 10 min every 2 h on postoperative days 1 and 2                                                                                               | No description                                                                                                                                                                                                                                         | Elective supraumbilical laparotomy        | Age > 15 y                                                                                           | Not stated a priori                                                                                                                                                                                              | No               | Unclear                    | No          | Unclear                                                                                        | No           |
| Fagevik Olsén et al., 1997 (23) | Chest physiotherapy                                                                             | Preoperative training in DBEs with pursed lips, huffing, coughing every tenth breath hourly after surgery; importance of position change in bed and early mobilization; high-risk patients were also given PEP; postoperative therapy was adjusted per physiotherapist or physician "according to pulmonary status"; duration of treatment was 10–15 min before and 15–20 min after surgery | No training before surgery, no therapy after surgery unless pulmonary complications occurred, then patients given physiotherapy with PEP                                                                                                               | Elective open abdominal surgery           | No data                                                                                              | No data                                                                                                                                                                                                          | No               | No data                    | No          | No: "[T]o avoid patient interference, cluster randomization was performed in alternate months" | Unclear      |
| Hall et al., 1991 (24)          | IS vs. chest physiotherapy                                                                      | IS device on bedside table, patient instructed in use; attending physicians' responsibility to promote its use perioperatively, preferably for 5 min in each waking hour                                                                                                                                                                                                                    | Treatment according to the clinical judgment of attending physicians and physiotherapists                                                                                                                                                              | Laparotomy "with manipulation of viscera" | Laparotomy "with manipulation of viscera"                                                            | Age < 14 y, preoperative pulmonary complication per outcome definitions                                                                                                                                          | No               | Yes                        | No          | Yes                                                                                            | Yes          |
| Hall et al., 1996 (25)          | Low-risk patients: 1) IS vs. 2) DBEs; high-risk patients: 3) IS vs. 4) IS + chest physiotherapy | 1) and 3) IS: information sheet and encouragement to use IS at least 10 times hourly                                                                                                                                                                                                                                                                                                        | 2) DBEs: seen once and encouraged to take 10 deep breaths hourly; 4) IS + chest physiotherapy had physiotherapy aimed at producing maximum inspiratory effort at least once daily for postoperative days 1–3, then at further rate per physiotherapist | Laparotomy "with manipulation of viscera" | Laparotomy "with manipulation of viscera"; high-risk patients defined as ASA class > 1 or age ≥ 60 y | Language, pulmonary complication before surgery, lack of consent due to declined participation or insufficient time before surgery                                                                               | No               | Yes                        | No          | Yes                                                                                            | Yes          |

Continued on following page

Appendix Table 1—Continued

| Author, Year (Reference)                  | Intervention                                             | Intervention Description                                                                                                                                                                                    | Control Description                                                                                                         | Type of Surgery                                                                  | Inclusion Criteria                                                                          | Exclusion Criteria                                                                                                                                                                                                                                                                                                                                | Patients Blinded | Outcome Assessment Blinded | Multicenter | Randomization Allocation Concealment | ITT Analysis |
|-------------------------------------------|----------------------------------------------------------|-------------------------------------------------------------------------------------------------------------------------------------------------------------------------------------------------------------|-----------------------------------------------------------------------------------------------------------------------------|----------------------------------------------------------------------------------|---------------------------------------------------------------------------------------------|---------------------------------------------------------------------------------------------------------------------------------------------------------------------------------------------------------------------------------------------------------------------------------------------------------------------------------------------------|------------------|----------------------------|-------------|--------------------------------------|--------------|
| Böhner et al., 2002 (26)                  | Nasal CPAP for 12 h after surgery                        | Intermediate care for at least 24 h after surgery with nasal CPAP at 10 cm H <sub>2</sub> O for at least 12 h after surgery to keep O <sub>2</sub> saturation > 95%                                         | Intermediate care for at least 24 h after surgery with oxygen by face mask or nasal cannula to keep oxygen saturation > 95% | Elective midline abdominal vascular surgery                                      | Elective midline abdominal vascular surgery scheduled to be extubated in the operating room | Emergency surgery, repair of thoracoabdominal aneurysm, exclusively retroperitoneal approach                                                                                                                                                                                                                                                      | No               | No data                    | No          | Yes                                  | Yes          |
| VA TPN Cooperative Study Group, 1991 (27) | Preoperative TPN                                         | TPN to caloric goal of 1000 kcal > resting metabolic expenditure; optimal was 7–15 d before surgery; suboptimal was < 7 d; TPN continued 72 h after surgery; oral intake as clinically allowed or tolerated | No TPN or forced enteral intake before surgery or after surgery for 72 h, then TPN or enteral if indicated                  | Elective laparotomy or thoracotomy                                               | Age ≥ 21 y, elective laparotomy or thoracotomy                                              | Death expected within 90 d, TPN in previous 15 d, other surgery within previous 30 d, contraindication to delay in surgery for TPN, TPN contraindicated, major concurrent illness, TPN essential, well-nourished                                                                                                                                  | No               | No                         | Yes         | Yes                                  | Yes          |
| Pacelli et al., 2001 (28)                 | TEN vs. TPN                                              | Postoperative TEN (during induction of TEN, TPN was added to achieve the same caloric intake as in the TPN group)                                                                                           | Postoperative TPN                                                                                                           | Major elective abdominal operations                                              | Age 18–80 y, malnourished, nutritional risk index < 90%                                     | Emergency surgery, elective appendectomy, cholecystectomy or viscerolysis                                                                                                                                                                                                                                                                         | No               | Unclear                    | Yes         | Yes                                  | Yes          |
| Bozzetti et al., 2001 (29)                | TEN vs. TPN                                              | Postoperative TEN: jejunostomy feeding tube or nasojejunal feeding tube placed during surgery                                                                                                               | Postoperative TPN                                                                                                           | Elective major resection for gastrointestinal cancer                             | Weight loss ≥ 10% usual body weight in previous 6 mo, histologically proven cancer          | Age < 18 y, liver dysfunction (Child–Pugh class > 2), serum creatinine level > 265.2 μmol/L (>3 mg/dL) or hemodialysis, NYHA functional class > III, history of stroke, pregnancy, ongoing infection, previous intestinal anastomosis of the large bowel without a diverting stoma                                                                | No               | No                         | Yes         | Yes                                  | Yes          |
| Gianotti et al., 2002 (30)                | Enteral immunonutrition                                  | 1) Oral immunonutrition for 5 d before surgery, no supplementation after surgery; 2) oral immunonutrition for 5 d before surgery and by jejunal feeding after surgery until oral intake resumed             | 3) Usual care, no enteral supplement, IV 5% glucose and electrolytes                                                        | Elective major resection for gastrointestinal cancer                             | Histologically proven cancer                                                                | Weight loss ≥ 10% of usual body weight in past 6 mo, age < 18 y, liver dysfunction (Child–Pugh class > B), Pao <sub>2</sub> < 70 mm Hg, creatinine level > 265.2 μmol/L (>3 mg/dL) or hemodialysis, NYHA class > 3, Karnofsky < 60, pregnancy, ongoing infection, neoadjuvant radiochemotherapy or neutrophil count < 2 × 10 <sup>9</sup> cells/L | No               | Unclear                    | No          | Yes                                  | Yes          |
| Sandham et al., 2003 (31)                 | Pulmonary artery catheter in high-risk surgical patients | Pulmonary artery catheter placed before surgery; treatment directed to a priori established physiologic goals and priorities                                                                                | No pulmonary artery catheter, central venous catheter allowed                                                               | Urgent and elective major abdominal, thoracic, vascular, or hip fracture surgery | Age ≥ 60 y, ASA class III or IV                                                             | No additional inclusion criteria                                                                                                                                                                                                                                                                                                                  | No               | Yes                        | Yes         | Yes                                  | Yes          |

\* ASA = American Society of Anesthesiologists; CPAP = continuous positive airway pressure; DBE = deep breathing exercise; IM = intramuscular; IS = incentive spirometry; ITT = intention-to-treat; IV = intravenous; LC = laparoscopic cholecystectomy; LCR = laparoscopic colorectal resection; NSAID = nonsteroidal anti-inflammatory drug; NYHA = New York Heart Association; OC = open cholecystectomy; OCR = open colorectal resection; PCA = patient-controlled analgesia; PCEA = patient-controlled epidural analgesia; PEP = positive expiratory pressure; QID = four times daily; TEN = total enteral nutrition; TPN = total parenteral nutrition; VA TPN = Veterans Affairs Total Parenteral Nutrition.
