# Supplementary material
Source: HighWire-hosted journal article supplement (https://www.annals.org/content/suppl/2006/04/12/144.8.596)
Supplement: Lawrence_AT2_144-8-596-DC1-2.pdf [file Lawrence_AT2_144-8-596-DC1-2.pdf]

Appendix Table 2. Abstracted Data for Eligible Randomized Trials, Continued\*

| Author, Year (Reference) | Sampling Strategy | Comorbid Conditions                                                                                                                                                                                                                                                                   | Important Baseline Differences?                                                             | Important Intraoperative Differences?                                                                                                                              | Anesthesia          | Follow-up                                                                                  | Important Differences in Co-Interventions Relevant for Pulmonary Complications?                  | Crossovers                                                                                                              | Participant Accrual                                                                                                                                                                                                   | Participant Attrition                                                                                          |
|--------------------------|-------------------|---------------------------------------------------------------------------------------------------------------------------------------------------------------------------------------------------------------------------------------------------------------------------------------|---------------------------------------------------------------------------------------------|--------------------------------------------------------------------------------------------------------------------------------------------------------------------|---------------------|--------------------------------------------------------------------------------------------|--------------------------------------------------------------------------------------------------|-------------------------------------------------------------------------------------------------------------------------|-----------------------------------------------------------------------------------------------------------------------------------------------------------------------------------------------------------------------|----------------------------------------------------------------------------------------------------------------|
| Møller et al., 2002 (12) | Consecutive       | Chronic heart disease, chronic obstructive lung disease, diabetes                                                                                                                                                                                                                     | No                                                                                          | None regarding percentage of patients receiving general anesthesia, duration of surgery, or number of hip or knee operations                                       | General or regional | Hospital stay                                                                              | No                                                                                               | No                                                                                                                      | 166 eligible, 46 declined, 120 randomly assigned                                                                                                                                                                      | 4 (intervention) and 8 (control): operation delayed or canceled                                                |
| Berg et al., 1997 (13)   | No data           | Smoking status, pulmonary disease                                                                                                                                                                                                                                                     | No; trends toward more smokers, droperidol, and inhaled anesthetic in the pancuronium group | Significantly more anesthetic minutes, residual neuromuscular block and minutes to extubation with pancuronium compared with vecuronium or atracurium              | General             | Postoperative day 6                                                                        | No                                                                                               | No                                                                                                                      | No data other than 693 patients eligible and enrolled                                                                                                                                                                 | 2 protocol violations                                                                                          |
| Norris et al., 2001 (14) | Consecutive?      | Diabetes, hypertension, renal insufficiency, cardiovascular and peripheral vascular disease, smoking                                                                                                                                                                                  | No                                                                                          | General anesthesia associated with significantly less operation and cross-clamping time compared with general + regional anesthesia                                |                     | Postoperative day 7 and 1, 3, 6, and 12 mo for mortality                                   | No                                                                                               | No                                                                                                                      | 309 evaluated, 62 ineligible, 48 declined, 24 "administrative exclusions," 176 consented, 7 not randomly assigned due to failed epidural, 8 randomly assigned to pilot study, 160 randomly assigned to reported study | None                                                                                                           |
| Rigg et al., 2002 (15)   | Consecutive?      | Morbid obesity, diabetes, chronic renal failure, cardiac failure, respiratory insufficiency, acute myocardial infarction, exertional angina, myocardial ischemia, severe liver disease                                                                                                | No                                                                                          | No data                                                                                                                                                            |                     | 30 d for mortality, complications; hospital stay?                                          | No data                                                                                          | Unclear how analgesia was handled for 222 patients assigned to epidural but not fully adherent to protocol              | 920 randomly assigned, 32 excluded after randomization                                                                                                                                                                | 32 excluded after randomization: 5 entered in study for second operation and 27 ineligible or canceled surgery |
| Park et al., 2001 (16)   | Consecutive?      | ASA class II or III, Goldman cardiac risk index, previous angina, myocardial infarction, congestive heart failure, hypertension, chronic obstructive lung disease, diabetes, renal failure, cerebrovascular accident, current smoking, history of alcoholism, alcoholic liver disease | No                                                                                          | No differences in operation severity or duration                                                                                                                   |                     | 30 d                                                                                       | Groups received similar antibiotic prophylaxis, bowel preparation, and intraoperative monitoring | Control to intervention: 48 patients; intervention to control: 32 patients                                              | 2731 screened, 1360 excluded, 350 declined, 1021 randomly assigned                                                                                                                                                    | 26 surgeries canceled, 11 withdrawals                                                                          |
| Fleron et al., 2003 (17) | Consecutive       | Coronary artery disease, hypertension, congestive heart failure, chronic obstructive lung disease, diabetes                                                                                                                                                                           | No                                                                                          | No                                                                                                                                                                 |                     | 30 d                                                                                       | No                                                                                               | Lumbar puncture could not be done in 3 patients in epidural group: They were switched to the control group for analysis | "217 patients who met all inclusion criteria were randomized"                                                                                                                                                         |                                                                                                                |
| Mann et al., 2000 (18)   | Consecutive?      | Coronary artery disease, diabetes, hypertension, chronic obstructive lung disease, depression                                                                                                                                                                                         | No                                                                                          | Patients randomly assigned to epidural had significantly less sufentanil and isoflurane, significantly more ephedrine, and significantly longer time to extubation |                     | Clinical: daily through postoperative day 7; chest radiography: postoperative days 1, 3, 5 | No                                                                                               | No data                                                                                                                 | 108 evaluated, 4 declined, 34 ineligible, 70 randomly assigned                                                                                                                                                        | 4 patients: no surgical resection; 2 patients: declined to use patient-controlled anesthesia                   |

Continued on following page

Appendix Table 2—Continued

| Author, Year (Reference)        | Sampling Strategy | Comorbid Conditions                                                                                                                    | Important Baseline Differences?                                                                                                                                                  | Important Intraoperative Differences?                                                                                                                                                                                                                                                                                   | Anesthesia                                                                | Follow-up                                      | Important Differences in Co-Interventions Relevant for Pulmonary Complications? | Crossovers                                                                                      | Participant Accrual                                                                                                                                                                          | Participant Attrition                                                                                                                                                                       |
|---------------------------------|-------------------|----------------------------------------------------------------------------------------------------------------------------------------|----------------------------------------------------------------------------------------------------------------------------------------------------------------------------------|-------------------------------------------------------------------------------------------------------------------------------------------------------------------------------------------------------------------------------------------------------------------------------------------------------------------------|---------------------------------------------------------------------------|------------------------------------------------|---------------------------------------------------------------------------------|-------------------------------------------------------------------------------------------------|----------------------------------------------------------------------------------------------------------------------------------------------------------------------------------------------|---------------------------------------------------------------------------------------------------------------------------------------------------------------------------------------------|
| Cuschieri et al., 1985 (19)     | Consecutive?      | Weight, smoking, respiratory disease                                                                                                   | No                                                                                                                                                                               | No for duration of anesthesia, trend toward more intraoperative opioids and longer time to first dose of postoperative analgesia in IM morphine group                                                                                                                                                                   |                                                                           | Postoperative day 3                            | No data                                                                         | 4 failed epidural catheter placement and received IM morphine                                   | "75 patients were included in the study, 25 in each group"                                                                                                                                   | None                                                                                                                                                                                        |
| Karayiannakis et al., 1996 (20) | Consecutive       | None reported                                                                                                                          | No for age, sex, weight, height, or other baseline data reported                                                                                                                 | No for operation and anesthesia time but trend toward shorter operation time (97 min ± 19 min vs. 108 min ± 23 min) and anesthesia time (116 min ± 15 min vs. 139 min ± 18 min) with LC                                                                                                                                 | General                                                                   | Hospital stay                                  | No                                                                              | 3 randomly assigned to LC required conversion to open operation and were excluded from analysis | 147 eligible, 49 declined, 98 randomly assigned                                                                                                                                              | 7 (2 LCs, 5 OCs) declined after randomization; 2 LCs excluded due to incomplete pulmonary tests; 3 LCs excluded due to conversion to OC; 4 OCs excluded due to common bile duct exploration |
| Vignali et al., 2004 (21)       | Consecutive       | ASA class, weight loss > 10%, cancer                                                                                                   | Patients having OCR were older than those having LCR (62 y ± 13.4 y vs. 66 y ± 12.2 y; P = 0.02); no differences for other reported comorbid conditions                          | No for intraoperative transfusion amount, tumor stage, or reason for operation; LCR was associated with longer operation time (221 min ± 69 min vs. 178 min ± 68 min; P = 0.0001), less intraoperative blood loss (177 mL ± 200 mL vs. 264 mL ± 292 mL; P = 0.01), less frequent transfusion (17% vs. 42%; P = 0.0001). | General + thoracic epidural                                               | 30 d after discharge with weekly office visits | No                                                                              | 10 randomly assigned to LCR required conversion to OCR                                          | 384 randomly assigned                                                                                                                                                                        | None                                                                                                                                                                                        |
| Chumillas et al., 1998 (22)     | Consecutive       | No data                                                                                                                                | No data except "no significant differences in sample characteristics or risk factors of both groups, including preoperative chest x-ray, with the exception of sex distribution" | No data except "no significant differences in average operation duration or types of incision"                                                                                                                                                                                                                          | General                                                                   | Postoperative day 6                            | No                                                                              | No data                                                                                         | 115 randomly assigned, 34 excluded (emergency operation, extrapulmonary complications, infraumbilical extension of incision, patient cooperation with intervention), 81 "evaluable patients" |                                                                                                                                                                                             |
| Fagevik Olsen et al., 1997 (23) | Consecutive       | Overweight smokers with high-risk ASA class                                                                                            | "No significant differences in background variables"                                                                                                                             | No significant difference in distribution of operation types but trend toward more upper abdominal operations in control group (30% vs. 39%)                                                                                                                                                                            | General                                                                   | Hospital stay                                  | No data                                                                         | No data                                                                                         | 368 randomly assigned                                                                                                                                                                        | 4 noncompletions: 2 control, 2 treatment                                                                                                                                                    |
| Hall et al., 1991 (24)          | Consecutive       | Preoperative hospital stay > 3 d, current smoker, chronic bronchitis, abnormal chest radiograph, Po <sub>2</sub> < 80 mm Hg, ASA class | No                                                                                                                                                                               | No for anesthesia time, distribution among 12 surgeons, intraperitoneal infection, type of incision, postoperative nasogastric decompression                                                                                                                                                                            | Unclear, presumably all general                                           | Hospital stay                                  | No data                                                                         | No data                                                                                         | 1032 screened; 156 excluded (5 <14 y of age, 3 retardation, 8 language, 14 declined, 25 preoperative pulmonary complication, 101 insufficient time to consent); 876 randomly assigned        | 35 randomly assigned patients did not have surgery: 21 IS, 14 chest physiotherapy                                                                                                           |
| Hall et al., 1996 (25)          | Consecutive       | ASA class, cancer, current smoker, chronic bronchitis                                                                                  | No                                                                                                                                                                               | No for operation time, procedure type, intraperitoneal infection, incision type or length, reoperation, nasogastric decompression, epidural analgesia                                                                                                                                                                   | No data, presumably all general, some with additional epidural anesthesia | Hospital stay                                  | No data                                                                         | No data                                                                                         | 619 screened; 143 excluded (13 language, 14 declined, 15 preoperative pulmonary complication, 115 lack of consent); 476 randomly assigned                                                    | 20 randomly assigned patients did not have surgery                                                                                                                                          |

Continued on following page

Appendix Table 2—Continued

| Author, Year (Reference)                  | Sampling Strategy | Comorbid Conditions                                                                                                                                                                              | Important Baseline Differences?                                                                                                                                                                                                                                     | Important Intraoperative Differences?                                                                                     | Anesthesia                  | Follow-up                          | Important Differences in Co-Interventions Relevant for Pulmonary Complications? | Crossovers                                                                                                                                                                                                 | Participant Accrual                                                                                                    | Participant Attrition                                                                                                                 |
|-------------------------------------------|-------------------|--------------------------------------------------------------------------------------------------------------------------------------------------------------------------------------------------|---------------------------------------------------------------------------------------------------------------------------------------------------------------------------------------------------------------------------------------------------------------------|---------------------------------------------------------------------------------------------------------------------------|-----------------------------|------------------------------------|---------------------------------------------------------------------------------|------------------------------------------------------------------------------------------------------------------------------------------------------------------------------------------------------------|------------------------------------------------------------------------------------------------------------------------|---------------------------------------------------------------------------------------------------------------------------------------|
| Böhner et al., 2002 (26)                  | Consecutive       | Smoking, coronary heart disease, pulmonary disease, ASA class                                                                                                                                    | No                                                                                                                                                                                                                                                                  | No for duration of surgery, blood loss, crystalloid, transfusion, autotransfusion, hypotension, hypertension, oxygenation | No data, presumably general | Hospital stay                      | No                                                                              | 9 patients did not tolerate nasal CPAP                                                                                                                                                                     | 237 randomly assigned                                                                                                  | 33 excluded after randomization for ineligible surgery or patient could not be extubated in operating room: 17 nasal CPAP, 16 control |
| VA TPN Cooperative Study Group, 1991 (27) | Consecutive       | Surgical diagnosis, nutritional status, percentage of usual body weight, serum albumin level, serum prealbumin level, triceps skinfold, nutrition risk index score, subjective global assessment | No differences except lower serum albumin level ( $3.65 \pm 3.6$ mg/dL vs. $3.71 \pm 3.7$ mg/dL; $P = 0.06$ †) and nutritional risk index score ( $92.3 \pm 6.4$ vs. $93.8 \pm 6.0$ ; $P = 0.01$ ), more severe malnutrition (15% vs. 9%; $P = 0.03$ ) in TPN group | No data                                                                                                                   | No data, presumably general | 30 d after surgery                 | No data                                                                         | Of 192 randomly assigned to TPN: 130 received optimal TPN, 49 received suboptimal TPN, and 13 received no TPN; of 203 randomly assigned to control, 3 received TPN                                         | 3259 screened, 811 excluded, 1497 did not meet nutrition criteria, 169 no surgery, 323 declined, 459 randomly assigned | Of 459 randomly assigned, 64 did not have surgery ( $n = 395$ study patients)                                                         |
| Pacelli et al., 2001 (28)                 | Consecutive       | Weight, percentage of usual weight, serum albumin level, type of cancer, benign gastrointestinal disease                                                                                         | "Similar" for demographic characteristics, nutritional status, and surgical diagnosis                                                                                                                                                                               | No for type of surgery, blood loss, intraoperative contamination                                                          | No data, presumably general | Hospital stay                      | All received heparin subcutaneously for prophylaxis and antibiotic prophylaxis  | 14 patients receiving TEN converted to TPN                                                                                                                                                                 | 241 randomly assigned                                                                                                  | None                                                                                                                                  |
| Bozzetti et al., 2001 (29)                | Consecutive       | Hypertension; heart valve disease; diabetes; arrhythmia; atherosclerotic disease (cardiac or peripheral); respiratory, liver, and central nervous system disease; neoadjuvant therapy            | No                                                                                                                                                                                                                                                                  | No for site of primary tumor, type of surgery, intraoperative contamination, duration of surgery, blood loss, transfusion | No data, presumably general | Hospital stay                      | No data                                                                         | 14 patients receiving TEN converted to TPN: 5 tube problems, 3 diarrhea, 5 anastomotic leak or bleeding, 1 intestinal obstruction                                                                          | 411 screened, 317 randomly assigned                                                                                    | None                                                                                                                                  |
| Gianotti et al., 2002 (30)                | Consecutive       | Hypertension; heart valve disease; diabetes; arrhythmia, atherosclerotic disease (cardiac or peripheral); respiratory, liver, and central nervous system disease; neoadjuvant therapy            | No                                                                                                                                                                                                                                                                  | No for type of surgery, blood loss, or transfusion                                                                        | No data, presumably general | 30 d after discharge               | No data except similar bowel preparation in all groups                          | No data                                                                                                                                                                                                    | 517 screened, 212 ineligible, 305 randomly assigned                                                                    | None                                                                                                                                  |
| Sandham et al., 2003 (31)                 | Consecutive       | History of angina, myocardial infarction, congestive heart failure, NYHA class, ASA risk class                                                                                                   | No                                                                                                                                                                                                                                                                  | No for type of surgery or percentage of urgent cases                                                                      | No data                     | Hospital stay, 12 mo for mortality | No                                                                              | Intervention: 58 did not receive planned therapy, 5 withdrew consent, 5 pulmonary artery catheter failed; control: 52 did not receive planned therapy, 24 crossed over to use of pulmonary artery catheter | 3803 screened, 1074 declined, 370 no ICU bed, 365 physicians did not refer to study, 1994 randomly assigned            | Hospital stay, none                                                                                                                   |

\* ASA = American Society of Anesthesiologists; CPAP = continuous positive airway pressure; ICU = intensive care unit; IM = intramuscular; IS = incentive spirometry; LC = laparoscopic cholecystectomy; LCR = laparoscopic colorectal resection; NYHA = New York Heart Association; OC = open cholecystectomy; OCR = open colorectal resection; TEN = total enteral nutrition; TPN = total parenteral nutrition; VA TPN = Veterans Affairs Total Parenteral Nutrition.

† To convert serum albumin values to g/L, multiply by 10.
