# Supplementary material
Source: HighWire-hosted journal article supplement (https://www.annals.org/content/suppl/2006/04/12/144.8.596)
Supplement: Lawrence_AT3_144-8-596-DC1-3.pdf [file Lawrence_AT3_144-8-596-DC1-3.pdf]

**Appendix Table 3. Abstracted Data for Eligible Randomized Trials, Continued\***

| Author, Year (Reference)                  | Lost to Follow-up or Incomplete Follow-up                                 | Patients in Intervention Group, n                                                                                             | Patients in Control Group, n                                  | Age Range, y                                               | Mean (SD) Age, y                                                               | Men, n (%)                                                                                                                  |
|-------------------------------------------|---------------------------------------------------------------------------|-------------------------------------------------------------------------------------------------------------------------------|---------------------------------------------------------------|------------------------------------------------------------|--------------------------------------------------------------------------------|-----------------------------------------------------------------------------------------------------------------------------|
| Møller et al., 2002 (12)                  | None                                                                      | 56                                                                                                                            | 52                                                            | 30–85                                                      | 66 (64)                                                                        | 24 (22)                                                                                                                     |
| Berg et al., 1997 (13)                    | 2 patients with clinical signs of pneumonia declined chest radiography    | 230 pancuronium                                                                                                               | 230 vecuronium; 231 atracurium                                | 24–81                                                      | 53 pancuronium; 54 vecuronium; 50 atracurium (no data given for SDs)           | No data                                                                                                                     |
| Norris et al., 2001 (14)                  | None                                                                      | 1) 39 general + regional + IV PCA; 2) 46 general + regional + epidural PCA                                                    | 3) 37 general + IV PCA; 4) 38 general + epidural PCA          |                                                            | 1) 70 (9.5); 2) 67 (10); 3) 68 (9.9); 4) 68 (8.4)                              | 1) 29 (78); 2) 26 (69); 3) 25 (63); 4) 35 (77)                                                                              |
| Rigg et al., 2002 (15)                    | None                                                                      | 441                                                                                                                           | 447                                                           | Intervention: 22–93; control: 26–92                        | Intervention: 69 (11); control: 69 (11)                                        | 503 (57)                                                                                                                    |
| Park et al., 2001 (16)                    | Follow-up at 30 d not completed for 11 patients                           | 514 enrolled; 489 completed follow-up at 30 d                                                                                 | 507 enrolled; 495 completed follow-up at 30 d                 |                                                            | Intervention: 66.5 (8.9); control: 67 (8.8)                                    | 1021 (100); women excluded                                                                                                  |
| Feron et al., 2003 (17)                   | None                                                                      | 102 (105 randomly assigned, epidural could not be done in 3 patients so they were assigned to the control group for analysis) | 115 (3 patients were from the intervention group)             |                                                            | Intervention: 67 (11); control: 66 (10)                                        | Intervention: 93 (89); control: 99 (88)                                                                                     |
| Mann et al., 2000 (18)                    | None                                                                      | 35                                                                                                                            | 35                                                            |                                                            | Epidural: 76 (5.6); control: 76.8 (4.7)                                        | Epidural: 20 (57); control: 18 (51)                                                                                         |
| Cuschieri et al., 1985 (19)               | None                                                                      | 25                                                                                                                            | 25 and 25                                                     | 18–75                                                      | Epidural: 51; IV morphine: 52; IM morphine: 52 (no data given for SDs)         | Epidural: 5 (20); IV morphine: 4 (28); IM morphine: 7 (28)                                                                  |
| Karayiannakis et al., 1996 (20)           | None                                                                      | 42                                                                                                                            | 40                                                            | LC: 32–79; OC: 34–76                                       | LC: 57 (range, 32–79); OC: 56 (range, 34–76)                                   | LC: 18 (43); OC: 18 (45)                                                                                                    |
| Vignali et al., 2004 (21)                 | None                                                                      | 190                                                                                                                           | 194                                                           |                                                            | LCR: 62 (13.4); OCR: 66 (12.2)                                                 | LCR: 92 (48); OCR: 108 (56)                                                                                                 |
| Chumillas et al., 1998 (22)               | None                                                                      | 40                                                                                                                            | 41                                                            | 18–85                                                      | 64 (range, 18–84)                                                              | 35 (43)                                                                                                                     |
| Fagevik Olsén et al., 1997 (23)           | None                                                                      | 172                                                                                                                           | 192                                                           | 19–92                                                      | Intervention: 53.5 (17.4); control: 52.9 (17.5)                                | Intervention: 72 (41); control: 86 (44)                                                                                     |
| Hall et al., 1991 (24)                    | None                                                                      | 431 IS                                                                                                                        | 445 chest physiotherapy                                       | IS: IQR, 32–70; chest physiotherapy: IQR, 32–72            | IS: 54; chest physiotherapy: 56                                                | IS: 221 (51); chest physiotherapy: 216 (49)                                                                                 |
| Hall et al., 1996 (25)                    | None                                                                      | 1) 79 low-risk IS; 3) 152 high-risk IS                                                                                        | 2) 76 low-risk DBE; 4) 149 high-risk IS + chest physiotherapy | 1) IQR, 29–44; 2) IQR, 62–76; 3) IQR, 29–43; 4) IQR, 58–76 | 1) 38 (IQR, 29–44); 2) 34 (IQR, 29–43); 3) 68 (IQR, 62–76); 4) 67 (IQR, 58–76) | 1) Low-risk IS: 34 (43); 2) high-risk IS: 70 (46); 3) low-risk DBE: 34 (45); 4) high-risk IS + chest physiotherapy: 71 (48) |
| Böhner et al., 2002 (26)                  | None                                                                      | 99                                                                                                                            | 105                                                           |                                                            | Nasal CPAP: 64.1 (12); control: 64.5 (11)                                      | Nasal CPAP: 84 (85); control: 82 (78)                                                                                       |
| VA TPN Cooperative Study Group, 1991 (27) | None                                                                      | 192                                                                                                                           | 203                                                           |                                                            | 62.9 (9.9)                                                                     | 455 (99)                                                                                                                    |
| Pacelli et al., 2001 (28)                 | None                                                                      | 119 TEN                                                                                                                       | 122 TPN                                                       |                                                            | TEN: 61.5 (10.8); TPN: 61.6 (11.8)                                             | TEN: 73 (61); TPN: 72 (59)                                                                                                  |
| Bozzetti et al., 2001 (29)                | None                                                                      | 159 TEN                                                                                                                       | 158 TPN                                                       |                                                            | TEN: 64.8 (11); TPN: 64.1 (10)                                                 | TEN: 93 (58); TPN: 92 (58)                                                                                                  |
| Gianotti et al., 2002 (30)                | None                                                                      | 1) 102; 2) 101                                                                                                                | 3) 102                                                        |                                                            | 1) 62.3 (12.3); 2) 65.6 (11.5); 3) 63.4 (11.9)                                 | 1) 50 (49); 2) 60 (59); 3) 56 (55)                                                                                          |
| Sandham et al., 2003 (31)                 | 101 patients, 5% for 6-mo mortality; 143 patients, 7% for 12-mo mortality | 997                                                                                                                           | 997                                                           |                                                            | Intervention: 72.3 (7); control: 72.6 (7)                                      | Intervention: 716 (72); control: 702 (70)                                                                                   |

\* CPAP = continuous positive airway pressure; DBE = deep breathing exercise; IM = intramuscular; IQR = interquartile range; IS = incentive spirometry; IV = intravenous; LC = laparoscopic cholecystectomy; LCR = laparoscopic colorectal resection; OC = open cholecystectomy; OCR = open colorectal resection; PCA = patient-controlled analgesia; TEN = total enteral nutrition; TPN = total parenteral nutrition; VA TPN = Veterans Affairs Total Parenteral Nutrition.
