# Supplementary material
Source: HighWire-hosted journal article supplement (https://www.annals.org/content/suppl/2006/04/12/144.8.596)
Supplement: Lawrence_AT4_144-8-596-DC1-4.pdf [file Lawrence_AT4_144-8-596-DC1-4.pdf]

Appendix Table 4. Abstracted Data for Eligible Randomized Trials, Continued\*

| Author, Year (Reference)          | Outcome Measure                                           | Intervention                 | Control                                    | P Value                                                                                                                                                          |
|-----------------------------------|-----------------------------------------------------------|------------------------------|--------------------------------------------|------------------------------------------------------------------------------------------------------------------------------------------------------------------|
| Møller et al., 2002 (12)          | Overall complications                                     | 10 (18%)                     | 27 (52%)                                   | 0.0003                                                                                                                                                           |
|                                   | Wound complications                                       | 3 (5%)                       | 16 (31%)                                   | 0.001                                                                                                                                                            |
|                                   | Second operation                                          | 2 (4%)                       | 8 (15%)                                    | 0.07                                                                                                                                                             |
|                                   | Cardiovascular insufficiency                              | 0                            | 5 (10%)                                    | 0.08                                                                                                                                                             |
|                                   | Respiratory insufficiency                                 | 1 (2%)                       | 1 (2%)                                     | 0.97                                                                                                                                                             |
|                                   | Nonorthopedic hospital days                               | 2/752 (0.3%)                 | 49/816 (6%)                                | 0.0001                                                                                                                                                           |
| Berg et al., 1997 (13)            | Postoperative O <sub>2</sub> > 3 L/min                    | 23 (10%)                     | 4.8 (6%)                                   | Pancuronium vs. atracurium, 0.047; pancuronium vs. vecuronium, 0.16                                                                                              |
|                                   | PPC: pneumonia or atelectasis                             | 19 (8%)                      | 14 (6.1%)                                  | Difference NS; P not given                                                                                                                                       |
|                                   | Patients with PPC and train-of-four ratio < 0.70          | 10/59 (17%)                  | 1/24 (4.2%) atracurium or vecuronium       | <0.002, but this P value is for comparison of pancuronium with and without train-of-four < 0.70, not a comparison of pancuronium vs. vecuronium or atracurium    |
|                                   | Median end of surgery to extubation (5th–95th percentile) | 15 min (0–40 min)            | 11 min (2–27 min); 10 min (0–25 min)       | <0.05                                                                                                                                                            |
|                                   | Median duration of anesthesia (5th–95th percentile)       | 160 min (75–290 min)         | 150 min (70–265 min); 152 min (70–280 min) | <0.05                                                                                                                                                            |
|                                   | Postoperative train-of-four ratio < 0.70                  | 59 (26%)                     | 13 (6%); 11 (5%)                           | <0.001                                                                                                                                                           |
| Norris et al., 2001 (14)          | Length of stay                                            | 1) 7 d; 2) 7 d               | 3) 8 d; 4) 7 d                             | 0.83                                                                                                                                                             |
|                                   | Hours to extubation                                       | 1) 19 h; 2) 16 h             | 3) 19 h; 4) 13 h                           | 0.01                                                                                                                                                             |
|                                   | Hospital mortality                                        | 1) 2 (5%); 2) 2 (5%)         | 3) 3 (7%); 4) 2 (4%)                       | 0.96                                                                                                                                                             |
|                                   | Cardiac mortality                                         | 1) 0; 2) 1 (2.8%)            | 3) 0; 4) 0                                 | 0.47                                                                                                                                                             |
|                                   | 12-mo mortality                                           | 1) 4 (10%); 2) 2 (5%)        | 3) 4 (10%); 4) 2 (4.4%)                    | 0.64                                                                                                                                                             |
|                                   | Reintubation                                              | 1) 1/35 (3%); 2) 0/36        | 3) 1/30 (3%); 4) 1/44 (2%)                 | 0.9                                                                                                                                                              |
|                                   | Prolonged intubation                                      | 1) 6/35 (17%); 2) 6/36 (17%) | 3) 8/36 (22%); 4) 3/44 (7%)                | 0.27                                                                                                                                                             |
|                                   | Pneumonia                                                 | 1) 0/35; 2) 1/36 (3%)        | 3) 1/36 (3%); 4) 0/44                      | 0.58                                                                                                                                                             |
| Rigg et al., 2002 (15)            | 30-d mortality                                            | 5.2%                         | 4.3%                                       | 0.67                                                                                                                                                             |
|                                   | Respiratory failure                                       | 23.3%                        | 30.2%                                      | 0.02                                                                                                                                                             |
|                                   | Cardiovascular event                                      | 25.7%                        | 24.0%                                      | 0.61                                                                                                                                                             |
| Park et al., 2001 (16)            | Mortality                                                 | 20 (4%)                      | 17 (3%)                                    | 0.74                                                                                                                                                             |
|                                   | Respiratory failure                                       | 51 (10%)                     | 71 (14%)                                   | 0.06                                                                                                                                                             |
|                                   | Pneumonia                                                 | 28 (5%)                      | 40 (8%)                                    | 0.15                                                                                                                                                             |
|                                   | Major cardiovascular complication                         | 44 (9%)                      | 57 (11%)                                   | 0.12                                                                                                                                                             |
|                                   | Subgroup analysis, abdominal aortic surgery               |                              |                                            |                                                                                                                                                                  |
|                                   | Mortality                                                 | 4/184 (2%)                   | 5/190 (3%)                                 | 0.96                                                                                                                                                             |
|                                   | Respiratory failure                                       | 26/184 (14%)                 | 53/190 (28%)                               | <0.01                                                                                                                                                            |
| Pneumonia                         | 8/184 (4%)                                                | 19/190 (10%)                 | 0.06                                       |                                                                                                                                                                  |
| Major cardiovascular complication | 18/184 (10%)                                              | 34/190 (18%)                 | 0.03                                       |                                                                                                                                                                  |
| Fleron et al., 2003 (17)          | Mortality                                                 | 2 (2%)                       | 7 (6%)                                     | NS; P not given                                                                                                                                                  |
|                                   | Lobar atelectasis                                         | 3 (3%)                       | 9 (8%)                                     | NS; P not given                                                                                                                                                  |
|                                   | Pneumonia                                                 | 5 (5%)                       | 6 (5%)                                     | NS; P not given                                                                                                                                                  |
|                                   | Respiratory failure                                       | 7 (7%)                       | 9 (8%)                                     | NS; P not given                                                                                                                                                  |
|                                   | Any pulmonary complication                                | 17 (16%)                     | 26 (23%)                                   | P calculate = 0.32                                                                                                                                               |
| Mann et al., 2000 (18)            | Segmental or lobar atelectasis                            | 7/31 (23%)                   | 6/33 (18%)                                 | 0.77                                                                                                                                                             |
|                                   | Moderate pulmonary complication                           | 3/31 (10%)                   | 2/33 (6%)                                  | NS                                                                                                                                                               |
|                                   | Major pulmonary complication                              | 1/31 (3%)                    | 1/33 (3%)                                  | NS                                                                                                                                                               |
| Cuschieri et al., 1985 (19)       | Atelectasis                                               | 5 (20%)                      | IM: 10 (40%); IV: 7 (28%)                  | IM or IV vs. epidural = NS; IM vs. epidural = 0.05 reported; 0.11 calculated from raw data; IV vs. epidural = 0.20; IM vs. epidural = 0.01; IV vs. epidural = NS |
|                                   | Chest infection                                           | 1 (4%)                       | IM: 6 (24%); IV: 5 (20%)                   |                                                                                                                                                                  |
|                                   | All pulmonary complications                               | 6 (24%)                      | IM: 16 (64%); IV: 12 (48%)                 |                                                                                                                                                                  |

Continued on following page

Appendix Table 4—Continued

| Author, Year (Reference)                  | Outcome Measure                                                                                                                                         | Intervention                                             | Control                                                                          | P Value                                                                     |
|-------------------------------------------|---------------------------------------------------------------------------------------------------------------------------------------------------------|----------------------------------------------------------|----------------------------------------------------------------------------------|-----------------------------------------------------------------------------|
| Karayiannakis et al., 1996 (20)           | Hospital stay                                                                                                                                           | 2.04 ± 0.62                                              | 5.65 ± 1.16                                                                      | <0.05                                                                       |
|                                           | Atelectasis incidence                                                                                                                                   | 12/42 (27%)                                              | 24/40 (63%)                                                                      | <0.05                                                                       |
|                                           | Atelectasis severity                                                                                                                                    | 7 micro, 3 focal, 2 segmental, 0 lobar                   | 14 micro, 7 focal, 3 segmental, 0 lobar                                          | <0.05                                                                       |
|                                           | Pneumonia                                                                                                                                               | No pneumonia                                             | No pneumonia                                                                     | Not applicable                                                              |
| Vignali et al., 2004 (21)                 | Respiratory tract infection                                                                                                                             | 3/190 (1.8%)                                             | 6/194 (3.5%)                                                                     | 0.52                                                                        |
| Chumillas et al., 1998 (22)               | Clinical pulmonary complications (atelectasis, bronchitis, pneumonia)                                                                                   | 3 (7.5%)                                                 | 8 (20%)                                                                          | 0.11                                                                        |
|                                           | Atelectasis on chest radiography                                                                                                                        | 6 (15%)                                                  | 16 (39%)                                                                         | 0.017                                                                       |
| Fagevik Olsén et al., 1997 (23)           | Pulmonary complications (Sao <sub>2</sub> < 92% or 2 of temperature > 38.2 °C, pathologic auscultation, atelectasis, or pneumonia on chest radiography) | 10/172 (6%)                                              | 52/192 (27%)                                                                     | <0.001                                                                      |
|                                           | Pneumonia                                                                                                                                               | 1/172 (0.6%)                                             | 13/192 (7%)                                                                      | <0.05                                                                       |
|                                           | Overall pulmonary complications                                                                                                                         |                                                          |                                                                                  |                                                                             |
|                                           | High-risk patients                                                                                                                                      | 6/40 (15%)                                               | 20/39 (51%)                                                                      | <0.001                                                                      |
|                                           | Low-risk patients                                                                                                                                       | 4/132 (3%)                                               | 32/153 (21%)                                                                     | <0.001                                                                      |
|                                           | Obese patients                                                                                                                                          | 3/36 (8%)                                                | 27/48 (56%)                                                                      | <0.001                                                                      |
| Hall et al., 1991 (24)                    | Clinical features of consolidation or collapse plus temperature > 38 °C and abnormal chest radiograph or sputum culture                                 | IS: 68/471 (16%)                                         | Chest physiotherapy: 68/445 (15%)                                                | 0.84                                                                        |
|                                           | Abnormal chest radiograph                                                                                                                               | IS: 96 (22%)                                             | Chest physiotherapy: 96 (22%)                                                    | NS                                                                          |
| Hall et al., 1996 (25)                    | Clinical features of consolidation or collapse plus temperature > 38 °C and abnormal chest radiograph or sputum culture                                 | 1) Low-risk IS: 6/79 (8%); 3) high-risk IS: 29/152 (19%) | 2) Low-risk DBE: 8/76 (11%); 4) high-risk IS + chest physiotherapy: 20/149 (13%) | Low risk: 1 vs. 3 ( <i>P</i> = 0.53); high risk: 2 vs. 4 ( <i>P</i> = 0.18) |
| Böhner et al., 2002 (26)                  | Pao <sub>2</sub> < 70 mm Hg with FiO <sub>2</sub> ≥ 0.7                                                                                                 | 5 (5.1%)                                                 | 17 (16.2%)                                                                       | 0.012                                                                       |
|                                           |                                                                                                                                                         | 2 (2%)                                                   | 5 (4.8%)                                                                         | 0.45                                                                        |
|                                           | Reintubation                                                                                                                                            | 1 (1%)                                                   | 5 (4.8%)                                                                         | 0.21                                                                        |
| VA TPN Cooperative Study Group, 1991 (27) | Pneumonia or empyema                                                                                                                                    | 16 (8%)                                                  | 9 (4%)                                                                           | 0.15                                                                        |
|                                           | Respiratory failure > 4 d                                                                                                                               | 13 (7%)                                                  | 11 (5%)                                                                          | 0.67                                                                        |
|                                           | Atelectasis                                                                                                                                             | 6 (3%)                                                   | 8 (4%)                                                                           | 0.79                                                                        |
|                                           | Transient respiratory failure                                                                                                                           | 6 (3%)                                                   | 6 (3%)                                                                           | 1.0                                                                         |
| Pacelli et al., 2001 (28)                 | Major postoperative complication                                                                                                                        | 45 (38%)                                                 | 48 (39%)                                                                         | 0.89                                                                        |
|                                           | Death                                                                                                                                                   | 7 (6%)                                                   | 3 (2.5%)                                                                         | 0.21                                                                        |
|                                           | Major infectious complication                                                                                                                           | 17 (14%)                                                 | 14 (11%)                                                                         | 0.57                                                                        |
|                                           | Major noninfectious complication                                                                                                                        | 28 (24%)                                                 | 27 (9%)                                                                          | 0.88                                                                        |
|                                           | Pneumonia                                                                                                                                               | 10 (8%)                                                  | 5 (4%)                                                                           | 0.19                                                                        |
|                                           | Respiratory failure                                                                                                                                     | 6 (5%)                                                   | 4 (3%)                                                                           | 0.54                                                                        |
|                                           | Pneumonia + respiratory failure                                                                                                                         | 16 (13%)                                                 | 9 (7%)                                                                           | 0.14                                                                        |
|                                           | Minor infection                                                                                                                                         | 23 (19%)                                                 | 23 (19%)                                                                         | 1.0                                                                         |
| Bozzetti et al., 2001 (29)                | Overall complications                                                                                                                                   | 54 (34%)                                                 | 78 (49%)                                                                         | 0.005                                                                       |
|                                           | Minor complications                                                                                                                                     | 40 (25%)                                                 | 57 (36%)                                                                         | 0.035                                                                       |
|                                           | Major complications                                                                                                                                     | 14 (9%)                                                  | 21 (13%)                                                                         | 0.207                                                                       |
|                                           | Infectious complications                                                                                                                                | 25 (16%)                                                 | 42 (27%)                                                                         | 0.018                                                                       |
|                                           | Noninfectious complications                                                                                                                             | 42 (26%)                                                 | 57 (36%)                                                                         | 0.064                                                                       |
|                                           | Respiratory tract infection                                                                                                                             | 9 (6%)                                                   | 14 (9%)                                                                          | 0.39                                                                        |
|                                           | Respiratory failure                                                                                                                                     | 4 (3%)                                                   | 6 (4%)                                                                           | 0.75                                                                        |
|                                           | Respiratory infection + failure                                                                                                                         | 13 (8%)                                                  | 20 (13%)                                                                         | 0.27                                                                        |

Continued on following page

## Appendix Table 4—Continued

| Author, Year (Reference)   | Outcomes                         |                          |             |                                 |
|----------------------------|----------------------------------|--------------------------|-------------|---------------------------------|
|                            | Outcome Measure                  | Intervention             | Control     | P Value                         |
| Gianotti et al., 2002 (30) | Death                            | 1) 1 (1%); 2) 2 (2%)     | 3) 1 (1%)   | NS                              |
|                            | Infectious complications         | 1) 14 (14%); 2) 16 (16%) | 3) 31 (30%) | 1 vs. 3 = 0.006; 2 vs. 3 = 0.02 |
|                            | Noninfectious complications      | 1) 30 (29%); 2) 28 (28%) | 3) 36 (35%) | NS                              |
|                            | Any complication                 | 1) 36 (35%); 2) 34 (34%) | 3) 49 (48%) | NS                              |
|                            | Respiratory tract infection      | 1) 3 (3%); 2) 6 (6%)     | 3) 8 (8%)   | 1 vs. 3 = 0.21; 2 vs. 3 = 0.78  |
|                            | Respiratory failure              | 1) 6 (6%); 2) 9 (9%)     | 3) 6 (6%)   | 1 vs. 3 = 1.0; 2 vs. 3 = 0.59   |
|                            | Respiratory infection or failure | 1) 9 (9%); 2) 15 (15%)   | 3) 14 (14%) | 1 vs. 3 = 0.38; 2 vs. 3 = 1.0   |
| Sandham et al., 2003 (31)  | In-hospital mortality            | 78 (7.8%)                | 77 (7.7%)   | 0.93                            |
|                            | Pneumonia                        | 63 (6.6%)                | 70 (7.3%)   | 0.70                            |

\* DBE = deep breathing exercise;  $FiO_2$  = fraction of inspired oxygen; IM = intramuscular; IV = intravenous; NS = not significant; PPC = postoperative pulmonary complication;  $SaO_2$  = arterial oxygen saturation; VA TPN = Veterans Affairs Total Parenteral Nutrition.
