# Supplementary material
Source: HighWire-hosted journal article supplement (https://www.annals.org/content/suppl/2006/04/12/144.8.596)
Supplement: Lawrence_AT6_144-8-596-DC1-6.pdf [file Lawrence_AT6_144-8-596-DC1-6.pdf]

Appendix Table 6. Abstracted Data for Eligible Systematic Reviews and Meta-Analyses\*

| Author, Year (Reference)       | Type of Surgery                    | Intervention                                      | Literature Search       |                                                                                      |                 |                     |                                  |                             |                                                                                      |
|--------------------------------|------------------------------------|---------------------------------------------------|-------------------------|--------------------------------------------------------------------------------------|-----------------|---------------------|----------------------------------|-----------------------------|--------------------------------------------------------------------------------------|
|                                |                                    |                                                   | Dates                   | Electronic Databases                                                                 | Gray Literature | Unpublished Studies | English-Language Literature Only | Trials Identified, <i>n</i> | Eligible Trials, <i>n</i>                                                            |
| Rodgers et al., 2000 (32)      | No restriction                     | Regional anesthesia (epidural or spinal)          | 1966–1998               | Current Contents, EMBASE, MEDLINE, Cochrane Library                                  | No data         | Yes                 | No                               | 158                         | 141                                                                                  |
| Urwin et al., 2000 (33)        | Hip fracture repair                | Regional anesthesia (epidural or spinal)          | Not stated              | Current Contents, EMBASE, MEDLINE, Cochrane Library Clinical Trials Registry, CINAHL | No data         | No                  | No                               | Not stated                  | 15                                                                                   |
| Ballantyne et al., 1998 (34)   | No restriction                     | Postoperative analgesic therapy                   | 1966–1995               | MEDLINE                                                                              | No data         | No                  | No data                          | 195                         | 48                                                                                   |
| Walder et al., 2001 (35)       | No restriction                     | IV PCA                                            | 1966–2000               | EMBASE, MEDLINE, Cochrane Library Clinical Trials Registry                           | No data         | No                  | No                               | 95                          | 32                                                                                   |
| Downs et al., 1996 (36)        | Cholecystectomy                    | LC                                                | 1987–1996               | EMBASE, MEDLINE                                                                      | Yes             | Yes                 | No                               | Unclear                     | 15 total; only 1 assessed a clinically relevant pulmonary complication (atelectasis) |
| Abraham et al., 2004 (37)      | Resection of colorectal cancer     | Laparoscopic resection                            | 1966–2002               | EMBASE, MEDLINE, Cochrane Library Clinical Trials Registry                           | No data         | No                  | Yes                              | 62                          | 12; unclear number assessing pulmonary complications                                 |
| Cheatham et al., 1995 (38)     | Elective laparotomy                | Selective postoperative nasogastric decompression | No data, published 1995 | Current Contents, MEDLINE                                                            | No data         | No                  | Yes                              | 17                          | 15                                                                                   |
| Nelson et al., 2005 (39)       | Laparotomy                         | Selective postoperative nasogastric decompression | No data, published 2005 | EMBASE, MEDLINE, Cochrane Library Clinical Trials Registry                           | No data         | No                  | Unclear                          | 33                          | 28 total; 19 report pulmonary complications                                          |
| Thomas and McIntosh, 1994 (40) | Upper abdominal surgery            | Postoperative lung expansion therapies            | 1966–1992               | MEDLINE, CINAHL                                                                      | No data         | No                  | Yes                              | Unclear                     | 14                                                                                   |
| Overend et al., 2001 (41)      | Abdominal surgery                  | Postoperative lung expansion therapies            | 1966–2000               | Current Contents, MEDLINE, CINAHL, HealthSTAR                                        | No data         | No                  | Yes                              | Unclear                     | 26                                                                                   |
| Moore et al., 1992 (42)        | High-risk surgery, no restrictions | Early enteral vs. TPN                             | No data                 | No data                                                                              | Yes             | Yes                 | No data                          | Unclear                     | 8 total; all appear to be industry-sponsored by 1 company                            |

\* IV = intravenous; LC = laparoscopic cholecystectomy; PCA = patient-controlled analgesia; TPN = total parenteral nutrition.
